# Supplementary material for: Lipid storage compounds in raw activated sludge microorganisms for biofuels and oleochemicals production
Source: Royal Society of Chemistry journal article supplement (doi:10.1039/c2ra01078j), 2012-01-01
Supplement: c2ra01078j.pdf [file c2ra01078j.pdf]

# Lipid Storage Compounds in Raw Activated Sludge Microorganisms for Biofuels and Oleochemicals Production

Emmanuel D. Revellame, Rafael Hernandez, William French, William E. Holmes, Tracy J. Benson, Patrisha J. Pham, Allison Forks and Robert Callahan II

Table S1 Experimental design for preliminary Bligh & Dyer extractions.<sup>a</sup>

| Experimental Run | Amount of Solids (g) | % Solids (weight) <sup>c</sup> | Solids to Solvent Ratio (g/L) <sup>d</sup> | Solids to Solvent Ratio (g/L) <sup>e</sup> | Solids to Solvent Ratio (g/L) <sup>f</sup> |
|------------------|----------------------|--------------------------------|--------------------------------------------|--------------------------------------------|--------------------------------------------|
| 1 <sup>b</sup>   | 0.00                 | 0.00                           | 0.00                                       | 0.00                                       | 0                                          |
| 2                | 0.10                 | 3.23                           | 5.33                                       | 2.00                                       | 0.91                                       |
| 3                | 0.20                 | 6.25                           | 10.67                                      | 4.00                                       | 1.82                                       |
| 4                | 0.30                 | 9.09                           | 16.00                                      | 6.00                                       | 2.73                                       |
| 5                | 0.40                 | 11.76                          | 21.33                                      | 8.00                                       | 3.64                                       |
| 6                | 0.57                 | 15.97                          | 30.40                                      | 11.40                                      | 5.18                                       |

<sup>a</sup> Experiments were conducted to determine if the water content (84 – 92% weight) of sludges was adequate for Bligh & Dyer extraction and to establish the number of extraction stages to effectively recover the lipidic materials in activated sludges.

<sup>b</sup> Blank/Control run.

<sup>c</sup> Water content of all samples = 3.0 mL (~3.0 grams).

<sup>d</sup> Single extraction. Total volume of solvent used = 18.75 mL (water content of samples not included).

<sup>e</sup> Double extraction. Total volume of solvent used = 50.00 mL (water content of samples not included).

<sup>f</sup> Five-stage extraction. Total volume of solvent used = 110.00 mL (water content of samples not included).

## Methods

### Single Extraction

To each of the samples, 7.5 mL of methanol and 3.75 mL of chloroform were added. Samples were then vortex-mixed for 30 minutes for homogenization. Then, 3.75 mL of water and 3.75 mL of chloroform were added and the mixtures were again vortex-mixed for 2 minutes. Phases were separated by centrifugation at 3000 rpm for 10 minutes after which, the organic (chloroform) layer was recovered. The solvent was evaporated to recover the extractable (lipidic) materials.

### Double Extraction

Another set of samples (as in single extraction) was subjected to second extraction. After the removal of the organic layer, 9.50

mL of methanol and 4.75 mL of chloroform were added to the raffinate (aqueous layer). The mixture was vortex-mixed for 30 minutes and then 8.5 mL of water and 8.5 mL of chloroform were added. The mixture was homogenized and centrifuged to separate the phases. The lower extract-rich layer was combined with the first one and the solvent was removed to recover the extractable materials

### Five-stage Extraction

The aqueous phases from the second extractions were subjected to three more extractions. Each extraction was conducted by addition of 20 mL chloroform to the aqueous phases followed by vortex-mixing, then by phase separation.

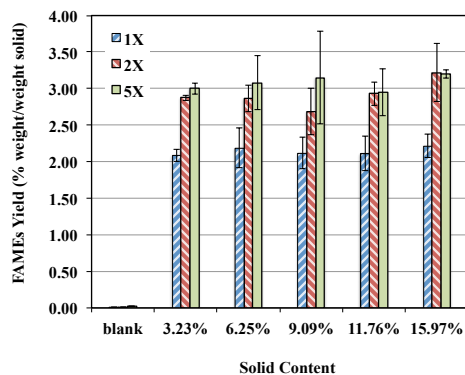

Fig. S1 FAMES yield as a function of solid content and number of Bligh & Dyer extraction stages. Single Extraction (1X): 18.75 mL Extraction solvent. Double Extraction (2X): 50 mL Extraction solvent. Five-stage extraction (5X): 110.00 mL Extraction solvent. Water content of samples: 3.00 mL. Extraction Temperature: ambient.

**Table S2** Chemical structures of different compounds present in municipal activated sludge in addition to alkanes, fatty acids, triacylglycerides, diacylglycerides, monoacylglycerides and phospholipids.

| Compound Class        | General Structure                                                                                                                                                                                                              | Example                                  | Structure                                                                                                                                                                                        |
|-----------------------|--------------------------------------------------------------------------------------------------------------------------------------------------------------------------------------------------------------------------------|------------------------------------------|--------------------------------------------------------------------------------------------------------------------------------------------------------------------------------------------------|
| Polyhydroxyalkanoates | 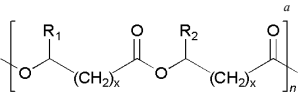 <p><math>R_1/R_2 = \text{alkyl groups from } C_1 \text{ to } C_{13}</math><br/> <math>x = 1 - 4</math><br/> <math>n = 100 - 30000</math></p> | Polyhydroxybutyrate                      |  <p><math>R_1 = R_2 = \text{CH}_3</math><br/> <math>x = 1</math></p>                                          |
|                       |                                                                                                                                                                                                                                | Poly(hydroxybutyrate-co-hydroxyvalerate) |  <p><math>R_1 = \text{CH}_3</math><br/> <math>R_2 = \text{CH}_2\text{CH}_3</math><br/> <math>x = 1</math></p> |
| Wax Esters (Waxes)    |  <p><math>R_1/R_2 = \text{alkyl groups}</math></p>                                                                                            | Stearyl Palmitate                        |                                                                                                                |
|                       |                                                                                                                                                                                                                                | Palmityl Oleate                          |                                                                                                                |
| Sterols               | -                                                                                                                                                                                                                              | Stigmasterol                             |                                                                                                             |
|                       |                                                                                                                                                                                                                                | Coprostanol                              |                                                                                                             |
|                       |                                                                                                                                                                                                                                | Stigmasteranol                           |                                                                                                             |

h

Steryl Esters

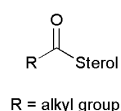

Cholesteryl Palmitate

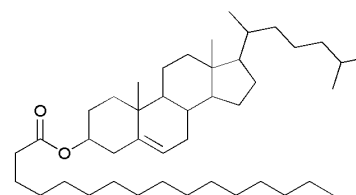

<sup>a</sup> E. Akaraonye, T. Keshavarz and I. Roy, *J. Chem. Technol. Biotechnol.*, 2010, **85**, 732-743.

<sup>b</sup> R. A. J. Verlinden, D. J. Hill, M. A. Kenward, C. D. Williams and I. Radecka, *J. Appl. Microbiol.*, 2007, **102**, 1437-1449.

<sup>c</sup> R. Garrett and C. M. Grisham, in *Biochemistry*, Brooks/Cole, Cengage Learning, Belmont, CA, 4th edn., 2010, ch. 8, pp. 219-241.

<sup>d</sup> R. Kalscheuer, T. Stöveken, H. Luftmann, U. Malkus, R. Reichelt and A. Steinbüchel, *Appl. Environ. Microbiol.*, 2006, **72**, 1373-1379.

<sup>e</sup> H. Zobelein, *Dictionary of renewable resources*, Wiley-VCH, Weinheim Chichester, 2001.

<sup>f</sup> M. M. Ehlers, A. Sundram, M. M. Kock and N. Potgieter, in *Environmental microbiology research trends*, ed. G. V. Kurladze, Nova Science Publishers, Inc., New York, 2007, ch. 4, pp. 137-166.

<sup>g</sup> R. J. Cole, M. A. Schweikert and B. B. Jarvis, in *Handbook of secondary fungal metabolites*, Academic Press, Amsterdam; Boston, 2003, vol. 2, ch. 3, pp. 91-126.

<sup>h</sup> D. P. Hajjar, in *Adv. Enzymol. Relat. Areas Mol. Biol.*, ed. A. Meister, John Wiley & Sons, Inc., 1994, vol. 69, pp. 45-82.

**Table S3** Analytical equipments and conditions.

| Analyte(s)                    | Equipment(s)                                 | Injector                                               | Detector                                                                             | Column                                                                                                | Oven                                                                                                                                                                     |
|-------------------------------|----------------------------------------------|--------------------------------------------------------|--------------------------------------------------------------------------------------|-------------------------------------------------------------------------------------------------------|--------------------------------------------------------------------------------------------------------------------------------------------------------------------------|
| Fatty Acid<br>Methyl Esters   | Agilent 6890N<br>GC                          | 260°C                                                  | Flame Ionization<br>Detector, 260°C                                                  | Restek Stabilwax-DA capillary<br>column, 30m × 0.25mm ID,<br>0.25µm film thickness                    | Initial temperature: 50°C, 2 minutes<br>Program 1: 250°C at 10°C/minute<br>Final time: 18 minutes                                                                        |
| Fractions 1 - 4               | Varian 3600<br>GC                            | Cool-on-<br>column, 50°C<br>to 380°C, at<br>180°C/min. | Flame Ionization<br>Detector, 380°C                                                  | Rtx®-Biodiesel TG, 15m ×<br>0.32mm ID, 0.10µm film<br>thickness with 2m × 0.53mm<br>Rxi® guard column | Initial temperature: 50°C, 1 minute<br>Program 1: 180°C at 15°C/minute<br>Program 2: 230°C at 7°C/minute<br>Program 3: 370°C at 20°C/minute<br>Final time: 11.20 minutes |
| Hydrocarbons                  | Varian 3400<br>GC<br><br>Agilent 6890N<br>GC | 260°C                                                  | Saturn 2000 ion-<br>trap mass<br>spectrometer<br>Flame Ionization<br>Detector, 260°C | Restek Stabilwax-DA capillary<br>column, 30m × 0.25mm ID,<br>0.25µm film thickness                    | Initial temperature: 50°C, 2 minutes<br>Program: 250°C at 2°C/minute<br>Final time: 18 minutes                                                                           |
| Sterols and<br>Fatty Alcohols | Agilent 6890N<br>GC                          | 280°C                                                  | 5975 inert Mass<br>Selective<br>Detector (mass<br>spectrometer)                      | Restek Rxi®-IMS, 10m ×<br>0.10mm ID, 0.10µm film<br>thickness                                         | Initial temperature: 50°C, 1.50 minutes,<br>Program 1: 100°C at 35°C/minute<br>Program 2: 310°C at 20°C/minute<br>Final time: 5 minutes                                  |
